# Supplementary material for: Non-Invasive Profiling of Advanced Prostate Cancer via Multi-Parametric Liquid Biopsy and Radiomic Analysis
Source: MDPI journal article supplement (doi:10.3390/ijms23052571), 2022-02-25
Supplement: s1 [file s1]

**Non-invasive profiling of advanced prostate cancer via multi-parametric liquid biopsy and radiomic analysis**

**Corresponding Author:**

Amir Goldkorn, MD  
Department of Medicine  
NOR 3444, NRT  
Health Sciences Campus  
Los Angeles, CA USA  
Email: [agoldkor@med.usc.edu](mailto:agoldkor@med.usc.edu)

# Supplementary Tables

**Supplementary Table S1. Summary chart of patient clinical data – part 1**

| ID  | Age | Mets |      |            | Last PSA at Blood Draw (ng/mL) | CRPC Treatment History |      |      |     |                                   |                  |             | BRCA Status          | Tx at Blood Draw (R= Responding, P=Progressing) |
|-----|-----|------|------|------------|--------------------------------|------------------------|------|------|-----|-----------------------------------|------------------|-------------|----------------------|-------------------------------------------------|
|     |     | LN   | Bone | Visceral   |                                | Abi                    | Enza | SipT | DTX | Other                             | No. of Therapies | No. of ARSI |                      |                                                 |
| 822 | 71  | -    | +    | -          | 365                            | +                      | +    | +    | +   | Radium 223, Docetaxel-taxotere    | 6                | 2           | 0                    | Lupron (P)                                      |
| 827 | 64  | -    | +    | -          | 3.07                           | +                      | -    | -    | -   | Bicalutamide, Nivolumab, Provenge | 4                | 2           | NT, mother BRCA      | Abiraterone ®                                   |
| 828 | 73  | +    | -    | -          | 136.8                          | +                      | +    | +    | +   | Rucaparib                         | 4                | 2           | 1                    | PARPi (P)                                       |
| 854 | 84  | -    | +    | Lung       | 0.14                           | -                      | -    | -    | +   | cabazitaxel, Cytosan              | 5                | 1           | NT                   | Not in charts                                   |
| 861 | 72  | -    | +    | -          | 337                            | +                      | +    | +    | -   | Radium 223, Olaparib              | 4                | 2           | 1, BRCA2             | PARPi (P)                                       |
| 898 | 73  | -    | +    | Lung/brain | 3975                           | -                      | +    | +    | +   | Radium 223                        | 4                | 2           | 0                    | Radium 223 (P)                                  |
| 903 | 57  | -    | +    | -          | 28                             | +                      | +    | -    | -   | enzalutamide-radium 223           | 3                | 2           | NT                   | ARSI-radium ®                                   |
| 908 | 52  | -    | +    | -          | 0.63                           | -                      | -    | -    | +   | Goserelin                         | 1                | 1           | NT                   | Docetaxel ®                                     |
| 909 | 87  | +    | -    | Lung       | 42.59                          | -                      | -    | -    | -   | Self-medication cocktail          | 1                | 1           | NT                   | "Prosta-mix" (P)                                |
| 911 | 72  | -    | +    | -          | 8.79                           | -                      | -    | -    | -   | Bicalutamide                      | 1                | 1           | NT                   | N/A (P)                                         |
| 912 | 82  | -    | -    | Lung       | 18.66                          | +                      | -    | -    | +   | Rucaparib                         | 4                | 2           | 0                    | PARPi (R)                                       |
| 913 | 63  | -    | +    | -          | 1588                           | +                      | -    | -    | -   | lpatasertib-abiraterone           | 3                | 1           | NT                   | ARSI-AKT Inhibitor (P)                          |
| 914 | ?   | -    | -    | Liver      | 0                              | -                      | -    | -    | -   | carbo-etop, carbo-irinotecan      | 2                | 0           | 1                    | Off treatment                                   |
| 916 | 64  | +    | -    | -          | 1.3                            | +                      | -    | -    | -   | N/A                               | 2                | 1           | 0                    | ARSI (PSA rising/P)                             |
| 917 | 68  | ?    | ?    | ?          | ?                              | ?                      | ?    | ?    | ?   | ?                                 | ?                | ?           | ?                    | ?                                               |
| 919 | 71  | +    | -    | -          | 0.24                           | -                      | -    | -    | -   | -                                 | 0                | 0           | NT, maternal history | Off-treatment                                   |
| 920 | ?   | -    | +    | brain      | 27.5                           | +                      | +    | ?    | +   | radium 223, craniectomy resection | 4                | 2           | NT                   | ARSI-radium ®                                   |
| 921 | ?   | -    | +    | -          | 24.9                           | +                      | +    | ?    | +   | ?                                 | ?                | ?           | NT                   | ARSI-Docetaxel (P)                              |
| 922 | ?   | -    | +    | -          | 11.1                           | ?                      | ?    | ?    | +   | ?                                 | ?                | ?           | NT                   | Docetaxel (P)                                   |
| 924 | 79  | +    | -    | -          | 97.78                          | -                      | +    | -    | -   | Bicalutamide, Apalutamide         | 4                | 3           | 0                    | Apalutamide (P)                                 |
| 925 | 72  | +    | +    | Bladder    | 8.2                            | +                      | +    | -    | -   | Bicalutamide,                     | 4                | 3           | NT                   | Radium-223 ®                                    |
| 928 | 67  | +    | +    | Liver      | 9.1                            | +                      | +    | -    | -   | Cabazitaxel, Bicalutamide         | 4                | 3           | 0                    | Cabazitaxel (P)                                 |

**Supplementary Table S1. Summary chart of patient clinical data – part 2**

| ID  | Solid Tumor NGS              |                                                                   |                    |                       |                       |                                       | Notes                     | Survival Status           | Date of Death (If Applicable) | PSA At Next Visit | Date of "Next Visit" | Date of Initial Blood Draw |
|-----|------------------------------|-------------------------------------------------------------------|--------------------|-----------------------|-----------------------|---------------------------------------|---------------------------|---------------------------|-------------------------------|-------------------|----------------------|----------------------------|
|     | Tissue Site (Date of biopsy) | # SSNVs                                                           | # CNVs (amps/dels) | Additional findings   | Mass                  | Imaging                               |                           |                           |                               |                   |                      |                            |
| 822 | Bone (12/27/2017)            | AR T878A, TP53 D281E, TMPRSS2-ERG fusion                          | AR amp             | MS-stable, TMB-low    | CT bone mets          | CT scan (11 days prior to blood draw) |                           | Alive                     | NA                            | 523.2             |                      | 2/6/2019                   |
| 827 |                              |                                                                   |                    |                       | CT bone mets          |                                       |                           | Alive                     | NA                            | 0                 |                      | 12/12/2018                 |
| 828 | LN (12/29/2017)              | BRCA2 pW993*, NOTCH1 pC1357*, RB1 c2107-2A>G                      | AR amp             | MSS, TMB-intermediate | CT lymph mets         | CT scan (15 days prior to blood draw) |                           | Alive                     | NA                            | Not in charts     |                      | 12/12/2018                 |
| 854 |                              |                                                                   |                    |                       | CT bone mets          | NA                                    | Neuroendocrine features   | Alive                     | NA                            | Not in charts     |                      | 2/5/2019                   |
| 861 | Temporal lobe (12/10/2018)   | BRCA2 pY1894K, pY1894*; FANCA pP1042A; RB1 c859_861+12del15       |                    | MSS, TMB-intermediate | CT bone mets          | CT scan (10 days prior to blood draw) |                           | Deceased                  | 19-Jul                        | 422               |                      | 12/19/2018                 |
| 898 | Bone (02/28/2018)            | PTEN C296*                                                        |                    | MS-stable, TMB-low    | CT bone mets          | CT scan (14 days prior to blood draw) |                           | Unknown / Likely Deceased | Hospice 2/27/2019             | 6655              |                      | 2/6/2019                   |
| 903 |                              |                                                                   |                    |                       | CT bone mets          | CT scan (22 days prior to blood draw) |                           | Alive                     | NA                            | 147.3             |                      | 2/25/2019                  |
| 908 | Primary (05/01/2018)         | TMPRSS2-ERG                                                       | ND                 | MSS, TMB-low          | CT bone mets          | CT scan (10 days prior to blood draw) | mHSPC- ADT + Docetaxel    | Alive                     | NA                            | 0.03              |                      | 12/12/2018                 |
| 909 |                              |                                                                   |                    |                       |                       |                                       |                           | Alive                     | NA                            | 128.9             |                      | 12/19/2018                 |
| 911 |                              |                                                                   |                    |                       |                       |                                       |                           | Alive                     | NA                            | 13                |                      | 1/7/2019                   |
| 912 |                              |                                                                   |                    | ATM mutation          | lung mass mets CT     | CT scan (13 days prior to blood draw) | mMIBC-chemo-RT to bladder | Alive                     | NA                            | 17.98             |                      | 1/9/2019                   |
| 913 |                              |                                                                   |                    |                       | CT bone mets          | CT scan (8 days prior to blood draw)  | LAC Patient               | Deceased                  | 11/17/2019                    | 1064              | 2/7/2019             | 1/14/2019                  |
| 914 | Omentum (10/09/17)           | PIK3CA P134S, CTNNB1 I35_G38del, TMPRSS2-ERG, CDH1 loss exon 1-14 | BRCA del           | MSS, TMB-low          | liver/adrenal mass CT | CT scan (5 days prior to blood draw)  | Neuroendocrine features   | ?                         | ?                             | ?                 |                      | 1/15/2019                  |
| 916 |                              |                                                                   |                    |                       | CT bone mets          |                                       |                           | Alive                     | NA                            | 2.7               |                      | 2/6/2019                   |

|     |                    |                                     |  |  |                 |                                             |             |                                 |                     |                  |           |           |
|-----|--------------------|-------------------------------------|--|--|-----------------|---------------------------------------------|-------------|---------------------------------|---------------------|------------------|-----------|-----------|
| 917 |                    |                                     |  |  |                 |                                             | LAC Patient | Alive                           | NA                  | 6.84             | 2/28/2019 | 2/7/2019  |
| 919 |                    |                                     |  |  |                 |                                             |             | Alive                           | NA                  | 0.5              |           | 3/13/2019 |
| 920 |                    |                                     |  |  | CT bone<br>mets | CT scan (60<br>days prior to<br>blood draw) | LAC Patient | Alive                           | NA                  | 27.56            | 3/21/2019 | 3/14/2019 |
| 921 |                    |                                     |  |  | CT bone<br>mets | CT scan (2<br>days prior to<br>blood draw)  | LAC Patient | Deceased                        | 10/6/2019           | 24.24            | 4/3/2019  | 3/14/2019 |
| 922 |                    |                                     |  |  | CT bone<br>mets | CT scan<br>(same day as<br>blood draw)      | LAC Patient | Deceased                        | 6/28/2019           | 12.4             | 5/2/2019  | 3/14/2019 |
| 924 | Blood (09/19/2018) | AR H875Y, TERT promoter -<br>124C>T |  |  |                 |                                             |             | Unknown<br>/ Likely<br>Deceased | After<br>12/30/2019 | 139.67           |           | 4/1/2019  |
| 925 |                    |                                     |  |  |                 |                                             |             | Unknown<br>/ Likely<br>Deceased | After 9/2019        | 21.4             |           | 4/10/2019 |
| 928 |                    |                                     |  |  |                 |                                             |             | Alive                           | NA                  | Not in<br>charts |           | 5/20/2019 |

**Supplementary Table S2. Cell-free DNA concentrations.**

|         | RareCyt <sup>e</sup> BCT | DNA Streck BCT         |
|---------|--------------------------|------------------------|
| Patient | ng cfDNA per ml plasma   | ng cfDNA per ml plasma |
| 822     | 35.3                     | 21.7                   |
| 827     | 0.9                      | 0.5                    |
| 828     | 11.3                     | 10.5                   |
| 854     | 69.3                     | 34.7                   |
| 861     | 186.0                    | 223.6                  |
| 898     | 1.2                      | 2.6                    |
| 908     | 4.5                      | 3.8                    |
| 909     | 2.9                      | 4.0                    |
| 911     | 3.2                      | 4.0                    |
| 912     | 2.6                      | 1.4                    |
| 913     | 2.6                      | 2.0                    |
| 914     | 5.3                      | 2.6                    |
| 920     | 2.9                      | 4.1                    |
| 903     | 8.3                      | 3.2                    |
| 916     | 4.5                      | 5.5                    |
| 918     | 7.6                      | 5.2                    |
| 919     | 11.8                     | 6.7                    |
| 921     | 16.2                     | 7.1                    |
| 922     | 12.2                     | 5.4                    |
| 924     | 4.3                      | 8.3                    |
| 925     | 0.2                      | 9.9                    |
| 928     | NT                       | NT                     |

**Supplementary Table S3: Clustering Classification Tree descriptors**

| Cluster type | Cluster number | Cluster descriptors                                                                                                                                                                  |
|--------------|----------------|--------------------------------------------------------------------------------------------------------------------------------------------------------------------------------------|
| 8 Clusters   | 1              | ThickMembrane CkEpCAM Background Max <= 5755.71<br>WholeCell SytoxOrange StDev <= 10580.95<br>WholeCell SytoxOrange Max<= 1294.13                                                    |
|              | 2              | ThickMembrane CkEpCAM Background Max <= 5755.71<br>WholeCell SytoxOrange StDev > 10580.95<br>ThickMembrane CkEpCAM Background Max <= 22226.45<br>CytoMem SytoxOrange Max <= 10253.45 |
|              | 3              | ThickMembrane CkEpCAM Background Max > 5755.71<br>ThickMembrane CkEpCAM Background Max <= 13469.30<br>ThinMembrane SytoxOrange StDev > 13758.95                                      |
|              | 4              | ThickMembrane CkEpCAM Background Max <= 5755.71<br>WholeCell SytoxOrange StDev <= 10580.95<br>WholeCell SytoxOrange Max > 1294.13                                                    |
|              | 5              | ThickMembrane CkEpCAM Background Max > 5755.71<br>ThickMembrane CkEpCAM Background Max <= 13469.30<br>ThinMembrane SytoxOrange StDev <= 13758.95                                     |
|              | 6              | ThickMembrane CkEpCAM Background Max <= 5755.71<br>WholeCell SytoxOrange StDev > 10580.95<br>ThickMembrane CkEpCAM Background Max <= 22226.45<br>CytoMem SytoxOrange Max > 10253.45  |
|              | 7              | ThickMembrane CkEpCAM Background Max <= 5755.71<br>WholeCell SytoxOrange StDev > 10580.95<br>ThickMembrane CkEpCAM Background Max > 22226.45<br>Nuclear CkEpCAM Max > 2768.56        |
|              |                | ThickMembrane CkEpCAM Background Max <= 5755.71<br>WholeCell SytoxOrange StDev > 10580.95<br>ThickMembrane CkEpCAM Background Max > 22226.45<br>Nuclear CkEpCAM Max <= 2768.56       |
|              | 8              | ThickMembrane CkEpCAM Background Max > 5755.71<br>ThickMembrane CkEpCAM Background Max > 13469.30                                                                                    |
| 2 Clusters   | 1              | Nuclear Extent > 0.52                                                                                                                                                                |

|  |   |                                                                                                                        |
|--|---|------------------------------------------------------------------------------------------------------------------------|
|  |   | Nuclear Extent <= 0.52<br>Nuclear SytoxOrange Entropy>2.18<br>Nuclear Eccentricity<=0.4                                |
|  |   | Nuclear Extent <= 0.52<br>Nuclear SytoxOrange Entropy>2.18<br>Nuclear Eccentricity>0.4<br>WholeCell Eccentricity<=0.32 |
|  | 2 | Nuclear Extent <= 0.52<br>Nuclear SytoxOrange Entropy<=2.18                                                            |
|  |   | Nuclear Extent <= 0.52<br>Nuclear SytoxOrange Entropy>2.18<br>Nuclear Eccentricity>0.4<br>WholeCell Eccentricity>0.32  |
